# Supplementary material for: Zeb2 DNA-Binding Sites in Neuroprogenitor Cells Reveal Autoregulation and Affirm Neurodevelopmental Defects, Including in Mowat-Wilson Syndrome
Source: Genes (Basel). 2023 Mar 2;14(3):629. doi: 10.3390/genes14030629 (PMC10048071; doi:10.3390/genes14030629)
Supplement: Supplementary file 1 [file genes-14-00629-s001.zip]

Archive with 10 entries (10 files):
- Birkhoff et al_2021_Supplementary File_1.xlsx
- __MACOSX/._Birkhoff et al_2021_Supplementary File_1.xlsx
- Birkhoff_et al_2021_Supplementary File 2.xlsx
- __MACOSX/._Birkhoff_et al_2021_Supplementary File 2.xlsx
- Birkhoff_et al_2021_Supplementary File 3.xlsx
- __MACOSX/._Birkhoff_et al_2021_Supplementary File 3.xlsx
- Birkhoff_et al_2021_Supplementary File 4.xlsx
- __MACOSX/._Birkhoff_et al_2021_Supplementary File 4.xlsx
- Supplementary Figures_R1.pdf
- __MACOSX/._Supplementary Figures_R1.pdf
