# Supplementary material for: Zeb2 DNA-Binding Sites in Neuroprogenitor Cells Reveal Autoregulation and Affirm Neurodevelopmental Defects, Including in Mowat-Wilson Syndrome
Source: Genes (Basel). 2023 Mar 2;14(3):629. doi: 10.3390/genes14030629 (PMC10048071; doi:10.3390/genes14030629)
Supplement: Supplementary file 1 [file genes-14-00629-s001.zip › Birkhoff_et al_2021_Supplementary File 4.xlsx]

## Sheet: Birkhoff_et al_2021_S4
Class	Gene	Dataset	Function
(Calcium) ion binding and channels	Caln1	Gsh2_only	May play a role in the physiology of neurons and is potentially important in memory and learning.
	Syt13	Gsh2_only	synaptotogmin family members can form homo- and heteromeric complexes with each other. They also have different biochemical properties and developmental profiles, and patterns of tissue distribution. Synaptotagmins function as membrane traffickers in multicellular organisms. May be involved in transport vesicle docking to the plasma membrane.
	Pcdh9	Gsh2_only	protein may be involved in signaling at neuronal synaptic junctions
	Efhd2	Gsh2_only	May regulate B-cell receptor (BCR)-induced immature and primary B-cell apoptosis. Plays a role as negative regulator of the canonical NF-kappa-B-activating branch. Controls spontaneous apoptosis through the regulation of BCL2L1 abundance.
	Fstl4	Nkx_Gsh2	Predicted to enable brain-derived neurotrophic factor binding activity and calcium ion binding activity. Predicted to be involved in cell differentiation. Predicted to act upstream of or within negative regulation of brain-derived neurotrophic factor receptor signaling pathway; negative regulation of collateral sprouting; and negative regulation of dendritic spine development
	Casq1	Nkx	This protein, also known as calmitine, functions as a calcium regulator in the mitochondria of skeletal muscle. This protein is absent in patients with Duchenne and Becker types of muscular dystrophy.
	Spock1	Gsh2_only	May play a role in cell-cell and cell-matrix interactions. May contribute to various neuronal mechanisms in the central nervous system
	Scube1	Nkx	This protein is expressed in platelets and endothelial cells and may play an important role in vascular biology
	Syt17	Nkx	Predicted to enable several functions, including calcium ion binding activity; phospholipid binding activity; and syntaxin binding activity. Involved in positive regulation of dendrite extension.
	Nalcn	Nkx	This gene encodes a voltage-independent, nonselective cation channel which belongs to a family of voltage-gated sodium and calcium channels that regulates the resting membrane potential and excitability of neurons. Naturally occurring mutations in this gene are associated with infantile neuroaxonal dystrophy, infantile hypotonia with psychomotor retardation and characteristic facies (IHPRF) syndr…
	Kcnj6	Nkx_Gsh2	his type of potassium channel allows a greater flow of potassium into the cell than out of it. These proteins modulate many physiological processes, including heart rate in cardiac cells and circuit activity in neuronal cells, through G-protein coupled receptor stimulation. Mutations in this gene are associated with Keppen-Lubinsky Syndrome, a rare condition characterized by severe developmental …
	Cacng5	Gsh2_only	This gene is a susceptibility locus for schizophrenia and bipolar disorder. Regulates the gating properties of AMPA-selective glutamate receptors (AMPARs). Modulates their gating properties by accelerating their rates of activation, deactivation and desensitization.
	Gpr6	Gsh2_only	Promotes neurite outgrowth and blocks myelin inhibition in neurons , regulation of metabolic process. Predicted to act upstream of or within positive regulation of cytosolic calcium ion concentration.
Synapses and synaptic junctions	Pcdh9	Gsh2_only	protein may be involved in signaling at neuronal synaptic junctions
	Grm2	Gsh2_only	G-protein coupled receptor for glutamate. May mediate suppression of neurotransmission or may be involved in synaptogenesis or synaptic stabilization
	Arc	Gsh2_only	Master regulator of synaptic plasticity
	Cbln4	Nkx_Gsh2	Acts as a synaptic organizer in specific subsets of neurons in the brain. Essential for the formation and maintenance of inhibitory GABAergic synapses. Promotes the development of dendrite-targeting inhibitory GABAergic synapses made by somatostatin-positive interneurons
	Sdk2	Nkx	Adhesion molecule that promotes lamina-specific synaptic connections in the retina and is specifically required for the formation of neuronal circuits that detect motion.
Axon guidance and outgrowth	Cntn5	Nkx	It may play a role in the formation of axon connections in the developing nervous system. Has some neurite outgrowth-promoting activity in the cerebral cortical neurons but not in hippocampal neurons. Probably involved in neuronal activity in the auditory system
	Ntng2	Gsh2_only	Involved in controlling patterning and neuronal circuit formation at the laminar, cellular, subcellular and synaptic levels. Promotes neurite outgrowth of both axons and dendrites
	Epha5	Nkx	Functions as an axon guidance molecule during development and may be involved in the development of the retinotectal, entorhino-hippocampal and hippocamposeptal pathways. Together with EFNA5 plays also a role in synaptic plasticity in adult brain through regulation of synaptogenesis.
	Sema3f	Nkx_Gsh2	involved in axon guidance during neuronal development
	Efna5	Nkx	prevents axon bundling in cocultures of cortical neurons with astrocytes, a model of late stage nervous system development and differentiation.
	Chodl	Nkx_Gsh2	May play a role in the development of the nervous system such as in neurite outgrowth and elongation. May be involved in motor axon growth and guidance
Neuronal subtypes	Rbfox3	Gsh2_only	This gene produces the neuronal nuclei (NeuN) antigen that has been widely used as a marker for post-mitotic neurons. This gene has its highest expression in the central nervous system and plays a prominent role in neural tissue development and regulation of adult brain function. Mutations in this gene have been associated with numerous neurological disorders.
	Gng7	Gsh2_only	May play a role in promoting maturation and morphological differentiation of cerebellar neurons
	Pax6	KD_Gsh2	Transcription factor with important functions in the development of the eye, nose, central nervous system and pancreas. Regulates specification of the ventral neuron subtypes by establishing the correct progenitor domains
	Klf7	KD_only	Plays a critical role in neuronal morphogenesis and survival of sensory neurons
	Gpr6	Gsh2_only	Promotes neurite outgrowth and blocks myelin inhibition in neurons , regulation of metabolic process. Predicted to act upstream of or within positive regulation of cytosolic calcium ion concentration.
	Cxcr4	KD_Gsh2_Nkx	Plays a role in regulation of cell migration, plays an essential role in vascularization of the gastrointestinal tract, probably by regulating vascular branching and/or remodeling processes in endothelial cells. Involved in cerebellar development. In the CNS, could mediate hippocampal-neuron survival
	Efna5	Nkx	prevents axon bundling in cocultures of cortical neurons with astrocytes, a model of late stage nervous system development and differentiation.
	Hmx2	Nkx	Transcription factor involved in specification of neuronal cell types and which is required for inner ear and hypothalamus development.
	Lhx5	Nkx	a transcriptional regulator and be involved in the control of differentiation and development of the forebrain. In mice, this protein is essential for the regulation of precursor cell proliferation and the control of neuronal differentiation and migration during hippocampal development. This protein is involved in learning and motor functions in adult mice.
	Isl1	Gsh2_only	Involved in the specification of motor neurons in cooperation with LHX3 and LDB1. Binds to insulin gene enhancer sequences. Essential for heart development.
	Cbln4	Nkx_Gsh2	Acts as a synaptic organizer in specific subsets of neurons in the brain. Essential for the formation and maintenance of inhibitory GABAergic synapses. Promotes the development of dendrite-targeting inhibitory GABAergic synapses made by somatostatin-positive interneurons
	Sdk2	Nkx	Adhesion molecule that promotes lamina-specific synaptic connections in the retina and is specifically required for the formation of neuronal circuits that detect motion.
	Cntn5	Nkx	It may play a role in the formation of axon connections in the developing nervous system. Has some neurite outgrowth-promoting activity in the cerebral cortical neurons but not in hippocampal neurons. Probably involved in neuronal activity in the auditory system
Motoric	Id2	KD_only	Implicated in regulating a variety of cellular processes, including cellular growth, senescence, differentiation, apoptosis, angiogenesis, and neoplastic transformation. Inhibits skeletal muscle and cardiac myocyte differentiation
	Casq1	Nkx	This protein, also known as calmitine, functions as a calcium regulator in the mitochondria of skeletal muscle. This protein is absent in patients with Duchenne and Becker types of muscular dystrophy.
	Nalcn	Nkx	This gene encodes a voltage-independent, nonselective cation channel which belongs to a family of voltage-gated sodium and calcium channels that regulates the resting membrane potential and excitability of neurons. Naturally occurring mutations in this gene are associated with infantile neuroaxonal dystrophy, infantile hypotonia with psychomotor retardation and characteristic facies (IHPRF) syndr…
	Lhx5	Nkx	a transcriptional regulator and be involved in the control of differentiation and development of the forebrain. In mice, this protein is essential for the regulation of precursor cell proliferation and the control of neuronal differentiation and migration during hippocampal development. This protein is involved in learning and motor functions in adult mice.
	Isl1	Gsh2_only	Involved in the specification of motor neurons in cooperation with LHX3 and LDB1. Binds to insulin gene enhancer sequences. Essential for heart development.
	Chodl	Nkx_Gsh2	May play a role in the development of the nervous system such as in neurite outgrowth and elongation. May be involved in motor axon growth and guidance
Other (neurodevelopental) disorders and behavior genes	Npas1	Nkx	May control regulatory pathways relevant to schizophrenia and to psychotic illness. May play a role in late central nervous system development by modulating EPO expression in response to cellular oxygen level
	Mest	Nkx	Diseases associated with MEST include Childhood-Onset Schizophrenia and Adult Cystic Nephroma. This gene encodes a member of the alpha/beta hydrolase superfamily. It is imprinted, exhibiting preferential expression from the paternal allele in fetal tissues, and isoform-specific imprinting in lymphocytes. The loss of imprinting of this gene has been linked to certain types of cancer and may be due…
	Cacng5	Gsh2_only	This gene is a susceptibility locus for schizophrenia and bipolar disorder. Regulates the gating properties of AMPA-selective glutamate receptors (AMPARs). Modulates their gating properties by accelerating their rates of activation, deactivation and desensitization.
	Foxp1	Gsh2_only	Diseases associated with FOXP1 include Intellectual Disability-Severe Speech Delay-Mild Dysmorphism Syndrome and Intellectual Developmental Disorder With Language Impairment And With Or Without Autistic Features. Among its related pathways are Nervous system development and Transcriptional regulation of pluripotent stem cells.
	Tmem151a	Gsh2_only	Diseases associated with TMEM151A include Benign Familial Infantile Epilepsy and Immunodeficiency-Centromeric Instability-Facial Anomalies Syndrome.
	Wdr62	Gsh2_only	This gene is proposed to play a role in cerebral cortical development. Mutations in this gene have been associated with microencephaly, cortical malformations, and cognitive disability.
	Kcnj6	Nkx_Gsh2	his type of potassium channel allows a greater flow of potassium into the cell than out of it. These proteins modulate many physiological processes, including heart rate in cardiac cells and circuit activity in neuronal cells, through G-protein coupled receptor stimulation. Mutations in this gene are associated with Keppen-Lubinsky Syndrome, a rare condition characterized by severe developmental …
	Drd4	Nkx	Mutations in this gene have been associated with various behavioral phenotypes, including autonomic nervous system dysfunction, attention deficit/hyperactivity disorder, and the personality trait of novelty seeking.
	Crhr2	Gsh2_only	This receptor shows high affinity for corticotropin releasing hormone (CRH), and also binds CRH-related peptides such as urocortin. CRH is synthesized in the hypothalamus, and plays an important role in coordinating the endocrine, autonomic, and behavioral responses to stress and immune challenge
	Ankfn1	Nkx	Predicted to be involved in establishment of mitotic spindle orientation and regulation of establishment of bipolar cell polarity. Predicted to act upstream of or within behavioral fear response; equilibrioception; and locomotor rhythm. Predicted to be active in spindle.
